# Supplementary material for: A guide to precise measurements of isotope abundance by ESI-Orbitrap MS
Source: Springer Nature journal article supplement (doi:10.1038/s41596-024-00981-5), 2024-04-23
Supplement: MOESM3 [file 41596_2024_981_MOESM3_ESM18.xlsx]

## Sheet: 15N
15N/M0				Evaluation via correction of the ratio					Evaluation via δ
Injection	Sample.name	Isotopocule	Ratio	Ratio USGS35 known	Correction factor	Corrected ratio USGS35	Ratio Air-N2	δUSGS32,Air-N2 / ‰	δUSGS32,USGS35 / ‰	δUSGS35,Air-N2 / ‰	δUSGS32,Air-N2 / ‰
2	USGS35	15N	0.00439695	0.00368639	0.838398		0.00367647			2.7
3	USGS32	15N	0.00517546			0.00434338		181.399	178.217		181.398
4	USGS35	15N	0.00438829	0.00368639	0.840052
5	USGS32	15N	0.00518581			0.00435373		184.216	181.026		184.215
6	USGS35	15N	0.00439358	0.00368639	0.839041
7	USGS32	15N	0.00518052			0.0043458		182.06	178.877		182.06
8	USGS35	15N	0.00439533	0.00368639	0.838707
9	USGS32	15N	0.00517321			0.00434078		180.693	177.513		180.692
10	USGS35	15N	0.00439134	0.00368639	0.839469
11	USGS32	15N	0.00516852			0.00434257		181.181	178		181.18
12	USGS35	15N	0.00438374	0.00368639	0.840924
13	USGS32	15N	0.00517185			0.00434506		181.857	178.674		181.856
14	USGS35	15N	0.00439197	0.00368639	0.839348

## Sheet: 17O
17O/M0				Evaluation via correction of the ratio					Evaluation via δ
Injection	Sample.name	Isotopocule	Ratio	Ratio USGS35 known	Correction factor	Corrected ratio USGS35	Ratio VSMOW	δUSGS32,VSMOW / ‰	δUSGS32,USGS35 / ‰	δUSGS35,VSMOW / ‰	δUSGS32,VSMOW / ‰
2	USGS35	17O	0.0014335	0.00119839	0.835992		0.0011397			51.5
3	USGS32	17O	0.00138338			0.00115735		15.4875	-34.2493		15.4869
4	USGS35	17O	0.00143138	0.00119839	0.83723
5	USGS32	17O	0.00138136			0.00115648		14.7196	-34.979		14.7196
6	USGS35	17O	0.00143148	0.00119839	0.837172
7	USGS32	17O	0.00137984			0.00115605		14.3441	-35.3366		14.3435
8	USGS35	17O	0.00142929	0.00119839	0.838454
9	USGS32	17O	0.00137477			0.00115028		9.28377	-40.1528		9.27937
10	USGS35	17O	0.00143527	0.00119839	0.834961
11	USGS32	17O	0.0013824			0.00115488		13.3176	-36.3126		13.3173
12	USGS35	17O	0.00143371	0.00119839	0.83587
13	USGS32	17O	0.00138245			0.001156		14.3016	-35.3766		14.3015
14	USGS35	17O	0.00143259	0.00119839	0.836523

## Sheet: 18O
18O/M0				Evaluation via correction of the ratio					Evaluation via δ
Injection	Sample.name	Isotopocule	Ratio	Ratio USGS35 known	Correction factor	Corrected ratio USGS35	Ratio VSMOW	δUSGS32,VSMOW / ‰	δUSGS32,USGS35 / ‰	δUSGS35,VSMOW / ‰	δUSGS32,VSMOW / ‰
2	USGS35	18O	0.00911224	0.0063615	0.698127		0.0060156			57.5
3	USGS32	18O	0.00883556			0.00616547		24.9127	-30.8156		24.9125
4	USGS35	18O	0.00912074	0.0063615	0.697476
5	USGS32	18O	0.00887474			0.00618743		28.5634	-27.3634		28.5632
6	USGS35	18O	0.00912809	0.0063615	0.696914
7	USGS32	18O	0.00886414			0.00618545		28.2345	-27.6758		28.2328
8	USGS35	18O	0.0091048	0.0063615	0.698697
9	USGS32	18O	0.00884687			0.00617618		26.6942	-29.1314		26.6935
10	USGS35	18O	0.00911985	0.0063615	0.697544
11	USGS32	18O	0.00885204			0.00618391		27.9794	-27.9176		27.9771
12	USGS35	18O	0.00909268	0.0063615	0.699628
13	USGS32	18O	0.00884619			0.006186		28.3262	-27.5877		28.326
14	USGS35	18O	0.00910164	0.0063615	0.69894

## Sheet: Calculations_perCV
Sample	Isotopocule ratio	Ratio expected	Ratio measured		Ratio measured corrected
			Average	%CV (rel. SD. / %)	Average	%CV (rel. SD. / %)
USGS32	15N/M0	0.00433823	0.00517589	0.121534	0.00434522	0.10441
USGS32	17O/M0	0.00115474	0.0013807	0.227829	0.00115517	0.218698
USGS32	18O/M0	0.0061702	0.00885326	0.158566	0.00618074	0.137036
Reference	Isotopocule ratio	Ratio reference	Ratio USGS32 measured corrected	δ expected / ‰	δ measured / ‰
					Average	SD
Air-N2	15N/M0	0.00367647	0.00434522	180	181.901	1.23403
VSMOW	17O/M0	0.0011397	0.00115517	13.2	13.5757	2.21667
VSMOW	18O/M0	0.0060156	0.00618074	25.7	27.4517	1.40798

## Sheet: Ratio_Calculation
Inputs
Primary Reference Material (PRM)	Isotope Ratio	Value		Standard	d15N / ‰	d18O / ‰	d17O / ‰**	** d17O=Δ17O+0.52*d18O
VSMOW	17O/16O	0.0003799		USGS32	180	25.7	13.2
VSMOW	18O/16O	0.0020052		Air-N2/VSMOW	0	0	0
Air-N2	15N/14N	0.00367647		USGS35	2.7	57.5	51.5
Calculation of probability for each isotope in every RM
RM	14N	15N	p(14N)	p(15N)	16O	17O	18O	p(16O)	p(17O)	p(18O)
USGS32	1	0.00433823	0.995681	0.00431949	1	0.000384915	0.00205673	0.997564	0.000383977	0.00205172
USGS35	1	0.00368639	0.996327	0.00367285	1	0.000399465	0.0021205	0.997486	0.000398461	0.00211517
Air-N2/VSMOW	1	0.00367647	0.996337	0.003663	1	0.0003799	0.0020052	0.997621	0.000378996	0.00200043
Calculation of isotopocule probability
RM	14N16O3 (monoisotopic, M0)	15N16O3	14N17O16O2	14N18O16O2
USGS32	0.988423	0.00428801	0.00114138	0.00609877
USGS35	0.988833	0.00364523	0.00118501	0.00629046
Air-N2/VSMOW	0.989242	0.00363691	0.00112744	0.00595088
Final output: isotopocule ratios
RM	15N16O3 / M0	14N17O16O2 / M0	14N18O16O2 / M0
Air-N2	0.00367647	0.0011397	0.0060156
USGS32	0.00433823	0.00115474	0.0061702
USGS35	0.00368639	0.00119839	0.0063615
